# Supplementary material
Source: publisher site journal article supplement (https://www.spandidos-publications.com/2603/downloadSupplementary)
Supplement: Supplementary file 1 [file downloadSupplementary]

## Sheet: Table SII
Table SII. MiRNAs that have a significant effect on patients' overall survival.
Name	Hazard ratio	95% CI	P-value	False discovery rate
miR150	0.392291	0.26-0.59	9.42736e-06	0.00405376
miR101-2	0.411055	0.26-0.64	8.46471e-05	0.0181991
miR101-1	0.424347	0.27-0.66	0.0001728	0.024768
miR1247	0.473817	0.31-0.72	0.000413313	0.0444311
miR301b	2.1175	1.36-3.29	0.000829363	0.0713252
miR4772	0.500931	0.33-0.76	0.00100297	0.0718795
miR130b	2.13934	1.34-3.41	0.00141177	0.086723
miR204	0.506836	0.33-0.78	0.0021392	0.102274
miR6510	0.517757	0.34-0.79	0.00214061	0.102274
miR1258	0.539832	0.36-0.81	0.00326813	0.140098
miR4742	1.86289	1.23-2.83	0.00358391	0.140098
miR223	0.53917	0.35-0.83	0.00479268	0.171738
miR31	0.567759	0.38-0.85	0.00658961	0.210535
miR195	0.561994	0.37-0.86	0.00720078	0.210535
miR937	1.86959	1.18-2.95	0.00734676	0.210535
miR1307	1.77548	1.16-2.71	0.00783385	0.210535
miR22	1.7519	1.14-2.68	0.00990845	0.244819
miR146a	0.590483	0.39-0.89	0.0115059	0.244819
let-7a-2	0.576137	0.38-0.88	0.0116814	0.244819
miR3677	1.74992	1.13-2.70	0.0117522	0.244819
miR7706	1.72774	1.13-2.65	0.0119563	0.244819
miR185	1.699	1.12-2.59	0.0133224	0.252073
miR324	1.73193	1.12-2.68	0.013483	0.252073
miR1262	0.612502	0.41-0.91	0.0152887	0.265769
let-7c	0.604363	0.40-0.91	0.0156733	0.265769
miR501	1.67099	1.10-2.55	0.016767	0.265769
miR4662a	1.63651	1.09-2.45	0.0168967	0.265769
miR203a	1.65208	1.09-2.50	0.0173059	0.265769
miR29a	0.589374	0.38-0.91	0.0181171	0.268633
miR9-2	1.67737	1.09-2.59	0.0194131	0.278254
miR503	1.6874	1.09-2.62	0.0201446	0.279425
miR652	0.611351	0.40-0.93	0.0211988	0.284859
miR9-3	1.6552	1.07-2.56	0.0232436	0.302871
miR218-2	0.619053	0.41-0.94	0.0244468	0.304561
miR3926-2	0.627498	0.42-0.94	0.0255703	0.304561
let-7a-1	0.60773	0.39-0.94	0.025979	0.304561
miR144	0.632573	0.42-0.95	0.0264575	0.304561
miR877	1.632	1.06-2.52	0.0273236	0.304561
let-7a-3	0.607855	0.39-0.95	0.027623	0.304561
miR500a	1.6098	1.05-2.47	0.0285324	0.306723
miR3130-1	0.620771	0.40-0.95	0.0297183	0.31168
let-7b	0.629506	0.41-0.96	0.0304642	0.311895
miR1301	1.59329	1.04-2.44	0.0322619	0.322619
miR671	1.5746	1.03-2.40	0.0349102	0.325572
miR27b	1.58559	1.03-2.43	0.0349619	0.325572
miR99b	1.56791	1.03-2.39	0.0368456	0.325572
miR133a-2	1.56637	1.03-2.39	0.0371051	0.325572
miR9-1	1.57222	1.03-2.41	0.0381385	0.325572
miR210	1.58183	1.03-2.44	0.0382391	0.325572
miR3127	1.55619	1.02-2.37	0.0384485	0.325572
miR26a-2	0.643053	0.42-0.98	0.0386143	0.325572
miR26a-1	0.652846	0.43-0.99	0.0443526	0.36635
miR509-1	1.54647	1.01-2.37	0.0452382	0.36635
miR320c-1	0.649299	0.42-0.99	0.0460068	0.36635
miR935	0.659206	0.44-1.00	0.048187	0.372583
miR365b	1.55156	1.00-2.40	0.0485225	0.372583
